# Supplementary material
Source: PubMed Central journal article supplement (PMC3819816)
Supplement: NIHMS521327-supplement-01.pdf [file NIHMS521327-supplement-01.pdf]

Web Appendix. Argentine Value Set

| EQ-5D State | VAS Mean | 95% CI Lower Bound | 95% CI Upper Bound | TTO Mean | 95% CI Lower Bound | 95% CI Upper Bound |
|-------------|----------|--------------------|--------------------|----------|--------------------|--------------------|
| 11111       | 1.000    | 1.000              | 1.000              | 1.000    | 1.000              | 1.000              |
| 11112       | 0.841    | 0.830              | 0.851              | 0.931    | 0.921              | 0.942              |
| 11113       | 0.504    | 0.476              | 0.531              | 0.505    | 0.468              | 0.544              |
| 11121       | 0.807    | 0.798              | 0.816              | 0.883    | 0.873              | 0.892              |
| 11122       | 0.716    | 0.695              | 0.737              | 0.831    | 0.822              | 0.840              |
| 11123       | 0.583    | 0.545              | 0.619              | 0.444    | 0.390              | 0.501              |
| 11131       | 0.463    | 0.453              | 0.475              | 0.431    | 0.411              | 0.452              |
| 11132       | 0.576    | 0.552              | 0.601              | 0.419    | 0.386              | 0.452              |
| 11133       | 0.372    | 0.359              | 0.386              | 0.281    | 0.264              | 0.297              |
| 11211       | 0.782    | 0.774              | 0.790              | 0.901    | 0.895              | 0.908              |
| 11212       | 0.691    | 0.672              | 0.712              | 0.850    | 0.834              | 0.865              |
| 11213       | 0.559    | 0.524              | 0.596              | 0.463    | 0.410              | 0.518              |
| 11221       | 0.658    | 0.633              | 0.684              | 0.802    | 0.784              | 0.819              |
| 11222       | 0.606    | 0.580              | 0.633              | 0.770    | 0.754              | 0.785              |
| 11223       | 0.519    | 0.490              | 0.548              | 0.480    | 0.437              | 0.525              |
| 11231       | 0.518    | 0.494              | 0.542              | 0.390    | 0.356              | 0.422              |
| 11232       | 0.512    | 0.494              | 0.530              | 0.455    | 0.434              | 0.477              |
| 11233       | 0.427    | 0.401              | 0.454              | 0.239    | 0.204              | 0.274              |
| 11311       | 0.471    | 0.450              | 0.491              | 0.573    | 0.545              | 0.604              |
| 11312       | 0.584    | 0.565              | 0.601              | 0.561    | 0.540              | 0.584              |
| 11313       | 0.380    | 0.363              | 0.399              | 0.422    | 0.397              | 0.448              |
| 11321       | 0.550    | 0.531              | 0.569              | 0.513    | 0.488              | 0.538              |
| 11322       | 0.544    | 0.524              | 0.564              | 0.579    | 0.558              | 0.599              |
| 11323       | 0.459    | 0.441              | 0.478              | 0.362    | 0.338              | 0.387              |
| 11331       | 0.339    | 0.306              | 0.373              | 0.349    | 0.297              | 0.406              |
| 11332       | 0.452    | 0.425              | 0.477              | 0.337    | 0.297              | 0.380              |
| 11333       | 0.266    | 0.242              | 0.291              | 0.188    | 0.148              | 0.232              |
| 12111       | 0.807    | 0.796              | 0.817              | 0.885    | 0.875              | 0.894              |
| 12112       | 0.716    | 0.692              | 0.739              | 0.833    | 0.813              | 0.851              |
| 12113       | 0.583    | 0.546              | 0.620              | 0.446    | 0.388              | 0.503              |
| 12121       | 0.682    | 0.656              | 0.710              | 0.785    | 0.763              | 0.806              |
| 12122       | 0.630    | 0.601              | 0.660              | 0.753    | 0.733              | 0.771              |
| 12123       | 0.544    | 0.513              | 0.573              | 0.463    | 0.416              | 0.511              |
| 12131       | 0.542    | 0.514              | 0.571              | 0.373    | 0.335              | 0.410              |
| 12132       | 0.537    | 0.514              | 0.558              | 0.438    | 0.413              | 0.463              |
| 12133       | 0.451    | 0.424              | 0.480              | 0.222    | 0.184              | 0.261              |
| 12211       | 0.658    | 0.629              | 0.686              | 0.803    | 0.777              | 0.828              |
| 12212       | 0.606    | 0.575              | 0.635              | 0.772    | 0.746              | 0.796              |
| 12213       | 0.520    | 0.489              | 0.549              | 0.482    | 0.435              | 0.528              |
| 12221       | 0.572    | 0.539              | 0.608              | 0.723    | 0.696              | 0.749              |
| 12222       | 0.561    | 0.538              | 0.583              | 0.711    | 0.695              | 0.727              |
| 12223       | 0.520    | 0.488              | 0.549              | 0.519    | 0.475              | 0.565              |
| 12231       | 0.478    | 0.454              | 0.501              | 0.409    | 0.382              | 0.435              |

|       |       |       |       |        |        |        |
|-------|-------|-------|-------|--------|--------|--------|
| 12232 | 0.513 | 0.491 | 0.533 | 0.494  | 0.471  | 0.517  |
| 12233 | 0.388 | 0.366 | 0.410 | 0.258  | 0.231  | 0.283  |
| 12311 | 0.550 | 0.529 | 0.572 | 0.515  | 0.488  | 0.544  |
| 12312 | 0.544 | 0.524 | 0.565 | 0.580  | 0.559  | 0.601  |
| 12313 | 0.459 | 0.440 | 0.478 | 0.364  | 0.337  | 0.390  |
| 12321 | 0.511 | 0.487 | 0.535 | 0.532  | 0.508  | 0.558  |
| 12322 | 0.545 | 0.518 | 0.571 | 0.618  | 0.587  | 0.648  |
| 12323 | 0.420 | 0.401 | 0.439 | 0.381  | 0.360  | 0.404  |
| 12331 | 0.418 | 0.385 | 0.450 | 0.291  | 0.246  | 0.336  |
| 12332 | 0.413 | 0.380 | 0.444 | 0.356  | 0.314  | 0.401  |
| 12333 | 0.345 | 0.318 | 0.371 | 0.129  | 0.091  | 0.165  |
| 13111 | 0.442 | 0.413 | 0.471 | 0.431  | 0.386  | 0.476  |
| 13112 | 0.555 | 0.512 | 0.597 | 0.419  | 0.349  | 0.493  |
| 13113 | 0.351 | 0.318 | 0.385 | 0.280  | 0.229  | 0.335  |
| 13121 | 0.521 | 0.480 | 0.560 | 0.370  | 0.305  | 0.440  |
| 13122 | 0.515 | 0.479 | 0.552 | 0.436  | 0.379  | 0.498  |
| 13123 | 0.430 | 0.387 | 0.475 | 0.219  | 0.146  | 0.296  |
| 13131 | 0.310 | 0.292 | 0.328 | 0.207  | 0.181  | 0.232  |
| 13132 | 0.423 | 0.390 | 0.456 | 0.195  | 0.143  | 0.245  |
| 13133 | 0.237 | 0.213 | 0.261 | 0.045  | 0.016  | 0.079  |
| 13211 | 0.497 | 0.459 | 0.536 | 0.389  | 0.325  | 0.458  |
| 13212 | 0.491 | 0.458 | 0.527 | 0.455  | 0.398  | 0.516  |
| 13213 | 0.406 | 0.361 | 0.450 | 0.238  | 0.165  | 0.312  |
| 13221 | 0.457 | 0.425 | 0.492 | 0.406  | 0.354  | 0.464  |
| 13222 | 0.492 | 0.454 | 0.528 | 0.492  | 0.437  | 0.554  |
| 13223 | 0.367 | 0.331 | 0.402 | 0.255  | 0.196  | 0.319  |
| 13231 | 0.365 | 0.333 | 0.397 | 0.165  | 0.117  | 0.210  |
| 13232 | 0.359 | 0.335 | 0.383 | 0.231  | 0.191  | 0.269  |
| 13233 | 0.292 | 0.253 | 0.330 | 0.004  | -0.054 | 0.061  |
| 13311 | 0.318 | 0.299 | 0.335 | 0.349  | 0.327  | 0.370  |
| 13312 | 0.431 | 0.410 | 0.452 | 0.337  | 0.300  | 0.377  |
| 13313 | 0.245 | 0.225 | 0.264 | 0.187  | 0.161  | 0.213  |
| 13321 | 0.397 | 0.376 | 0.419 | 0.288  | 0.254  | 0.326  |
| 13322 | 0.392 | 0.371 | 0.412 | 0.354  | 0.326  | 0.387  |
| 13323 | 0.324 | 0.296 | 0.350 | 0.127  | 0.085  | 0.173  |
| 13331 | 0.204 | 0.177 | 0.229 | 0.114  | 0.078  | 0.151  |
| 13332 | 0.317 | 0.290 | 0.342 | 0.102  | 0.061  | 0.142  |
| 13333 | 0.148 | 0.130 | 0.164 | -0.058 | -0.083 | -0.033 |
| 21111 | 0.744 | 0.735 | 0.752 | 0.824  | 0.816  | 0.831  |
| 21112 | 0.652 | 0.630 | 0.676 | 0.772  | 0.755  | 0.788  |
| 21113 | 0.520 | 0.484 | 0.557 | 0.385  | 0.330  | 0.440  |
| 21121 | 0.619 | 0.593 | 0.647 | 0.724  | 0.704  | 0.743  |
| 21122 | 0.567 | 0.539 | 0.597 | 0.692  | 0.674  | 0.708  |
| 21123 | 0.481 | 0.451 | 0.509 | 0.402  | 0.358  | 0.447  |
| 21131 | 0.479 | 0.456 | 0.504 | 0.312  | 0.275  | 0.346  |
| 21132 | 0.473 | 0.456 | 0.492 | 0.378  | 0.355  | 0.399  |
| 21133 | 0.388 | 0.363 | 0.415 | 0.161  | 0.127  | 0.197  |

|       |       |       |       |       |       |       |
|-------|-------|-------|-------|-------|-------|-------|
| 21211 | 0.594 | 0.567 | 0.623 | 0.742 | 0.717 | 0.765 |
| 21212 | 0.543 | 0.513 | 0.573 | 0.711 | 0.688 | 0.733 |
| 21213 | 0.456 | 0.427 | 0.484 | 0.421 | 0.377 | 0.466 |
| 21221 | 0.509 | 0.476 | 0.544 | 0.662 | 0.637 | 0.687 |
| 21222 | 0.498 | 0.475 | 0.520 | 0.651 | 0.638 | 0.664 |
| 21223 | 0.457 | 0.424 | 0.487 | 0.458 | 0.415 | 0.502 |
| 21231 | 0.415 | 0.395 | 0.436 | 0.348 | 0.323 | 0.371 |
| 21232 | 0.449 | 0.432 | 0.466 | 0.433 | 0.412 | 0.454 |
| 21233 | 0.325 | 0.305 | 0.343 | 0.197 | 0.175 | 0.219 |
| 21311 | 0.487 | 0.467 | 0.507 | 0.454 | 0.429 | 0.479 |
| 21312 | 0.481 | 0.463 | 0.499 | 0.520 | 0.498 | 0.539 |
| 21313 | 0.396 | 0.379 | 0.414 | 0.303 | 0.279 | 0.329 |
| 21321 | 0.447 | 0.424 | 0.471 | 0.471 | 0.448 | 0.496 |
| 21322 | 0.482 | 0.456 | 0.507 | 0.557 | 0.527 | 0.590 |
| 21323 | 0.357 | 0.339 | 0.376 | 0.320 | 0.300 | 0.341 |
| 21331 | 0.355 | 0.323 | 0.387 | 0.230 | 0.186 | 0.275 |
| 21332 | 0.350 | 0.318 | 0.381 | 0.295 | 0.253 | 0.340 |
| 21333 | 0.282 | 0.257 | 0.305 | 0.068 | 0.031 | 0.104 |
| 22111 | 0.619 | 0.589 | 0.648 | 0.725 | 0.696 | 0.751 |
| 22112 | 0.567 | 0.535 | 0.599 | 0.694 | 0.666 | 0.719 |
| 22113 | 0.481 | 0.449 | 0.509 | 0.404 | 0.354 | 0.451 |
| 22121 | 0.533 | 0.500 | 0.570 | 0.645 | 0.616 | 0.672 |
| 22122 | 0.522 | 0.498 | 0.545 | 0.634 | 0.616 | 0.651 |
| 22123 | 0.481 | 0.451 | 0.509 | 0.442 | 0.398 | 0.488 |
| 22131 | 0.440 | 0.415 | 0.463 | 0.331 | 0.301 | 0.358 |
| 22132 | 0.474 | 0.455 | 0.492 | 0.417 | 0.395 | 0.438 |
| 22133 | 0.349 | 0.327 | 0.371 | 0.180 | 0.153 | 0.206 |
| 22211 | 0.509 | 0.473 | 0.546 | 0.664 | 0.629 | 0.696 |
| 22212 | 0.498 | 0.473 | 0.521 | 0.652 | 0.629 | 0.673 |
| 22213 | 0.457 | 0.427 | 0.485 | 0.460 | 0.416 | 0.503 |
| 22221 | 0.464 | 0.436 | 0.491 | 0.604 | 0.580 | 0.627 |
| 22222 | 0.492 | 0.472 | 0.510 | 0.612 | 0.594 | 0.632 |
| 22223 | 0.497 | 0.447 | 0.542 | 0.517 | 0.462 | 0.577 |
| 22231 | 0.416 | 0.395 | 0.435 | 0.387 | 0.365 | 0.408 |
| 22232 | 0.490 | 0.452 | 0.525 | 0.493 | 0.454 | 0.531 |
| 22233 | 0.325 | 0.308 | 0.342 | 0.236 | 0.216 | 0.256 |
| 22311 | 0.447 | 0.424 | 0.472 | 0.473 | 0.447 | 0.497 |
| 22312 | 0.482 | 0.458 | 0.505 | 0.559 | 0.530 | 0.585 |
| 22313 | 0.357 | 0.338 | 0.375 | 0.322 | 0.298 | 0.343 |
| 22321 | 0.448 | 0.421 | 0.474 | 0.510 | 0.479 | 0.541 |
| 22322 | 0.522 | 0.479 | 0.565 | 0.616 | 0.568 | 0.665 |
| 22323 | 0.357 | 0.335 | 0.379 | 0.359 | 0.333 | 0.387 |
| 22331 | 0.316 | 0.278 | 0.352 | 0.249 | 0.204 | 0.298 |
| 22332 | 0.350 | 0.316 | 0.381 | 0.334 | 0.291 | 0.384 |
| 22333 | 0.243 | 0.214 | 0.270 | 0.088 | 0.049 | 0.124 |
| 23111 | 0.458 | 0.419 | 0.497 | 0.311 | 0.246 | 0.380 |
| 23112 | 0.452 | 0.417 | 0.488 | 0.377 | 0.320 | 0.437 |

|       |       |       |       |        |        |        |
|-------|-------|-------|-------|--------|--------|--------|
| 23113 | 0.367 | 0.323 | 0.411 | 0.160  | 0.086  | 0.237  |
| 23121 | 0.418 | 0.385 | 0.452 | 0.329  | 0.274  | 0.387  |
| 23122 | 0.453 | 0.415 | 0.489 | 0.414  | 0.359  | 0.477  |
| 23123 | 0.328 | 0.291 | 0.365 | 0.178  | 0.118  | 0.242  |
| 23131 | 0.326 | 0.294 | 0.357 | 0.087  | 0.040  | 0.134  |
| 23132 | 0.320 | 0.295 | 0.345 | 0.153  | 0.115  | 0.190  |
| 23133 | 0.253 | 0.214 | 0.290 | -0.074 | -0.130 | -0.016 |
| 23211 | 0.394 | 0.363 | 0.427 | 0.347  | 0.292  | 0.404  |
| 23212 | 0.428 | 0.393 | 0.462 | 0.433  | 0.379  | 0.490  |
| 23213 | 0.303 | 0.268 | 0.338 | 0.196  | 0.134  | 0.259  |
| 23221 | 0.394 | 0.362 | 0.427 | 0.384  | 0.336  | 0.438  |
| 23222 | 0.469 | 0.416 | 0.519 | 0.490  | 0.423  | 0.564  |
| 23223 | 0.304 | 0.267 | 0.339 | 0.234  | 0.176  | 0.294  |
| 23231 | 0.262 | 0.237 | 0.287 | 0.123  | 0.089  | 0.157  |
| 23232 | 0.297 | 0.276 | 0.318 | 0.209  | 0.175  | 0.246  |
| 23233 | 0.189 | 0.158 | 0.218 | -0.038 | -0.083 | 0.007  |
| 23311 | 0.334 | 0.313 | 0.355 | 0.229  | 0.195  | 0.267  |
| 23312 | 0.328 | 0.310 | 0.348 | 0.295  | 0.266  | 0.325  |
| 23313 | 0.261 | 0.234 | 0.286 | 0.068  | 0.025  | 0.114  |
| 23321 | 0.295 | 0.272 | 0.318 | 0.246  | 0.220  | 0.276  |
| 23322 | 0.329 | 0.305 | 0.352 | 0.332  | 0.300  | 0.367  |
| 23323 | 0.221 | 0.199 | 0.245 | 0.085  | 0.050  | 0.122  |
| 23331 | 0.220 | 0.191 | 0.247 | -0.005 | -0.047 | 0.035  |
| 23332 | 0.214 | 0.187 | 0.240 | 0.060  | 0.023  | 0.095  |
| 23333 | 0.164 | 0.135 | 0.193 | -0.177 | -0.219 | -0.135 |
| 31111 | 0.373 | 0.352 | 0.393 | 0.368  | 0.338  | 0.399  |
| 31112 | 0.485 | 0.460 | 0.509 | 0.356  | 0.328  | 0.387  |
| 31113 | 0.282 | 0.258 | 0.307 | 0.217  | 0.186  | 0.249  |
| 31121 | 0.451 | 0.430 | 0.472 | 0.308  | 0.281  | 0.337  |
| 31122 | 0.446 | 0.424 | 0.469 | 0.373  | 0.347  | 0.402  |
| 31123 | 0.361 | 0.336 | 0.386 | 0.157  | 0.125  | 0.191  |
| 31131 | 0.241 | 0.212 | 0.270 | 0.144  | 0.097  | 0.194  |
| 31132 | 0.354 | 0.331 | 0.379 | 0.132  | 0.091  | 0.172  |
| 31133 | 0.168 | 0.144 | 0.191 | -0.017 | -0.056 | 0.020  |
| 31211 | 0.427 | 0.410 | 0.445 | 0.326  | 0.303  | 0.351  |
| 31212 | 0.422 | 0.403 | 0.440 | 0.392  | 0.369  | 0.417  |
| 31213 | 0.337 | 0.314 | 0.359 | 0.175  | 0.146  | 0.206  |
| 31221 | 0.388 | 0.369 | 0.408 | 0.344  | 0.320  | 0.365  |
| 31222 | 0.422 | 0.392 | 0.452 | 0.429  | 0.391  | 0.469  |
| 31223 | 0.297 | 0.277 | 0.317 | 0.193  | 0.169  | 0.219  |
| 31231 | 0.296 | 0.270 | 0.320 | 0.102  | 0.060  | 0.141  |
| 31232 | 0.290 | 0.265 | 0.316 | 0.168  | 0.128  | 0.207  |
| 31233 | 0.222 | 0.200 | 0.245 | -0.059 | -0.093 | -0.024 |
| 31311 | 0.249 | 0.212 | 0.284 | 0.286  | 0.231  | 0.344  |
| 31312 | 0.362 | 0.341 | 0.382 | 0.274  | 0.240  | 0.308  |
| 31313 | 0.176 | 0.147 | 0.204 | 0.125  | 0.080  | 0.168  |
| 31321 | 0.328 | 0.302 | 0.353 | 0.226  | 0.191  | 0.264  |

|       |       |       |       |        |        |        |
|-------|-------|-------|-------|--------|--------|--------|
| 31322 | 0.322 | 0.291 | 0.353 | 0.291  | 0.248  | 0.333  |
| 31323 | 0.255 | 0.237 | 0.274 | 0.064  | 0.038  | 0.092  |
| 31331 | 0.135 | 0.087 | 0.180 | 0.051  | -0.025 | 0.135  |
| 31332 | 0.247 | 0.213 | 0.282 | 0.039  | -0.019 | 0.099  |
| 31333 | 0.079 | 0.049 | 0.109 | -0.120 | -0.177 | -0.063 |
| 32111 | 0.452 | 0.432 | 0.472 | 0.309  | 0.283  | 0.337  |
| 32112 | 0.446 | 0.424 | 0.466 | 0.375  | 0.352  | 0.400  |
| 32113 | 0.361 | 0.337 | 0.384 | 0.159  | 0.126  | 0.192  |
| 32121 | 0.412 | 0.392 | 0.433 | 0.327  | 0.303  | 0.349  |
| 32122 | 0.447 | 0.417 | 0.475 | 0.413  | 0.376  | 0.449  |
| 32123 | 0.322 | 0.302 | 0.342 | 0.176  | 0.151  | 0.203  |
| 32131 | 0.320 | 0.295 | 0.346 | 0.085  | 0.044  | 0.125  |
| 32132 | 0.314 | 0.288 | 0.341 | 0.151  | 0.112  | 0.190  |
| 32133 | 0.247 | 0.223 | 0.272 | -0.076 | -0.110 | -0.040 |
| 32211 | 0.388 | 0.371 | 0.405 | 0.345  | 0.326  | 0.366  |
| 32212 | 0.422 | 0.396 | 0.448 | 0.431  | 0.398  | 0.463  |
| 32213 | 0.297 | 0.280 | 0.314 | 0.195  | 0.171  | 0.219  |
| 32221 | 0.388 | 0.361 | 0.412 | 0.383  | 0.350  | 0.413  |
| 32222 | 0.462 | 0.412 | 0.512 | 0.488  | 0.430  | 0.551  |
| 32223 | 0.298 | 0.274 | 0.323 | 0.232  | 0.198  | 0.268  |
| 32231 | 0.256 | 0.227 | 0.285 | 0.121  | 0.079  | 0.162  |
| 32232 | 0.291 | 0.261 | 0.320 | 0.207  | 0.160  | 0.252  |
| 32233 | 0.183 | 0.160 | 0.205 | -0.040 | -0.073 | -0.008 |
| 32311 | 0.328 | 0.305 | 0.350 | 0.227  | 0.194  | 0.262  |
| 32312 | 0.322 | 0.294 | 0.350 | 0.293  | 0.252  | 0.332  |
| 32313 | 0.255 | 0.239 | 0.270 | 0.066  | 0.041  | 0.090  |
| 32321 | 0.288 | 0.254 | 0.320 | 0.245  | 0.203  | 0.290  |
| 32322 | 0.323 | 0.286 | 0.359 | 0.330  | 0.277  | 0.379  |
| 32323 | 0.215 | 0.191 | 0.238 | 0.083  | 0.052  | 0.114  |
| 32331 | 0.214 | 0.174 | 0.254 | -0.007 | -0.068 | 0.056  |
| 32332 | 0.208 | 0.168 | 0.250 | 0.059  | -0.005 | 0.125  |
| 32333 | 0.158 | 0.133 | 0.181 | -0.179 | -0.224 | -0.136 |
| 33111 | 0.220 | 0.195 | 0.244 | 0.143  | 0.109  | 0.178  |
| 33112 | 0.332 | 0.300 | 0.363 | 0.131  | 0.083  | 0.184  |
| 33113 | 0.146 | 0.117 | 0.177 | -0.018 | -0.057 | 0.023  |
| 33121 | 0.299 | 0.272 | 0.326 | 0.083  | 0.040  | 0.132  |
| 33122 | 0.293 | 0.266 | 0.322 | 0.149  | 0.108  | 0.191  |
| 33123 | 0.225 | 0.189 | 0.261 | -0.078 | -0.130 | -0.021 |
| 33131 | 0.105 | 0.080 | 0.131 | -0.091 | -0.129 | -0.055 |
| 33132 | 0.218 | 0.190 | 0.248 | -0.103 | -0.148 | -0.055 |
| 33133 | 0.050 | 0.029 | 0.072 | -0.263 | -0.292 | -0.233 |
| 33211 | 0.274 | 0.250 | 0.302 | 0.102  | 0.059  | 0.148  |
| 33212 | 0.269 | 0.245 | 0.295 | 0.167  | 0.129  | 0.209  |
| 33213 | 0.201 | 0.167 | 0.237 | -0.060 | -0.110 | -0.005 |
| 33221 | 0.235 | 0.213 | 0.260 | 0.119  | 0.085  | 0.156  |
| 33222 | 0.269 | 0.237 | 0.302 | 0.205  | 0.158  | 0.255  |
| 33223 | 0.162 | 0.133 | 0.194 | -0.042 | -0.084 | 0.006  |

|       |        |        |        |        |        |        |
|-------|--------|--------|--------|--------|--------|--------|
| 33231 | 0.160  | 0.135  | 0.188  | -0.133 | -0.177 | -0.089 |
| 33232 | 0.155  | 0.129  | 0.180  | -0.067 | -0.107 | -0.027 |
| 33233 | 0.104  | 0.072  | 0.135  | -0.305 | -0.349 | -0.259 |
| 33311 | 0.113  | 0.085  | 0.140  | 0.051  | 0.014  | 0.088  |
| 33312 | 0.226  | 0.209  | 0.246  | 0.039  | 0.006  | 0.073  |
| 33313 | 0.057  | 0.038  | 0.077  | -0.121 | -0.147 | -0.097 |
| 33321 | 0.192  | 0.173  | 0.212  | -0.010 | -0.041 | 0.022  |
| 33322 | 0.187  | 0.163  | 0.211  | 0.056  | 0.022  | 0.090  |
| 33323 | 0.136  | 0.115  | 0.158  | -0.181 | -0.213 | -0.148 |
| 33331 | 0.016  | -0.014 | 0.046  | -0.194 | -0.244 | -0.141 |
| 33332 | 0.129  | 0.105  | 0.154  | -0.206 | -0.250 | -0.164 |
| 33333 | -0.022 | -0.038 | -0.009 | -0.376 | -0.411 | -0.342 |
